# Supplementary material for: Amine olefin rhodium(i) complexes: pKaand NH bond strength
Source: Royal Society of Chemistry journal article supplement (doi:10.1039/b409981h), 2004-01-01
Supplement: b409981h.pdf [file b409981h.pdf]

**[Rh(trop<sub>2</sub>N)(tropNH<sub>2</sub>)] (6)**

MF: C<sub>45</sub>H<sub>35</sub>N<sub>2</sub>Rh

MW: 706.68 g/mol

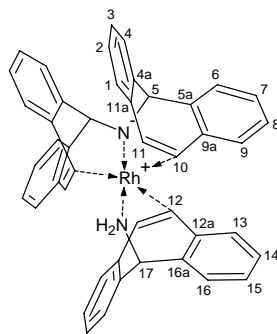

The amide complex **6** was prepared in small quantities. To a solution of **5** in 0.5 ml thf[d<sub>8</sub>] in an NMR tube, 1 mg of KO<sup>t</sup>Bu was added and the colour of the solution changed immediately from yellow to orange. Crystals of the product were obtained upon slow diffusion of 2 ml *n*-hexane into the reaction mixture.

In situ deprotonation of **5** in DMSO[d<sub>6</sub>] gave the pK<sub>a</sub> value of the secondary amine function (pK<sub>a</sub> = 20.6) using indole as reference acid.

<sup>1</sup>H NMR (400.1 MHz, DMSO-d<sub>6</sub>) δ = 2.42 (s, will be exchanged with time, 2H, NH<sub>2</sub>), 3.33 (d, <sup>3</sup>J<sub>HH</sub> = 9.5 Hz, 2 H, H<sup>10</sup>), 3.56 (s, 2 H, H<sup>12</sup>), 3.70 (s, 2 H, H<sup>5</sup>), 4.74 (s, 1 H, H<sup>17</sup>), 5.01 (d, <sup>3</sup>J<sub>HH</sub> = 9.5 Hz, 2 H, H<sup>11</sup>), 6.48 – 7.32 (H<sub>ar</sub>)

<sup>1</sup>H NMR (700.1 MHz, THF-d<sub>8</sub>) δ = 3.27 (d, <sup>3</sup>J<sub>HH</sub> = 9.6 Hz, 2 H, H<sup>10</sup>), 3.75 (s, 4 H, H<sup>5</sup>/H<sup>12</sup>), 4.81 (s, 1 H, H<sup>17</sup>), 4.89 (d, <sup>3</sup>J<sub>HH</sub> = 9.6 Hz, 2 H, H<sup>11</sup>), 6.51 (m, 2 H, H<sup>2</sup>), 6.52 (d, <sup>3</sup>J<sub>HH</sub> = 7.4 Hz, 2 H, H<sup>4</sup>), 6.58 (m, 2 H, H<sup>3</sup>), 6.64 (m, 2 H, H<sup>9</sup>), 6.75 (d, <sup>3</sup>J<sub>HH</sub> = 7.4 Hz, 2 H, H<sup>1</sup>), 6.78 (d, <sup>3</sup>J<sub>HH</sub> = 7.4 Hz, 2 H, H<sup>13</sup>), 7.01 (m, 4 H, H<sup>7</sup>/H<sup>8</sup>), 7.07 (m, 2 H, H<sup>6</sup>), 7.17 (m, 2 H, H<sup>15</sup>), 7.21 (m, 2 H, H<sup>16</sup>), 7.24 (m, 2 H, H<sup>14</sup>), the resonance of the NH<sub>2</sub> protons was not detected, probably due to rapid exchange of these protons with the OH protons of the *tert*-butanol formed in the reaction.

<sup>13</sup>C NMR (176.1 MHz, THF-d<sub>8</sub>) δ = 62.8 (s, 1 C, C<sup>17</sup>), 71.1 (d, <sup>1</sup>J<sub>RhC</sub> = 9.2 Hz, 2 C, C<sup>11</sup>), 77.7 (d, <sup>1</sup>J<sub>RhC</sub> = 7.2 Hz, 2 C, C<sup>10</sup>), 78.8 (s, 2 C, C<sup>5</sup>), 91.6 (d, <sup>1</sup>J<sub>RhC</sub> = 5.4 Hz, 2 C, C<sup>12</sup>), 124.4 (s, 2 C, C<sup>8</sup>), 125.0 (s, 2 C, C<sup>3</sup>), 126.2 (s, 4 C, C<sup>3</sup>/C<sup>7</sup>), 126.5 (s, 2 C, C<sup>15</sup>), 126.6 (s, 2 C, C<sup>6</sup>), 126.8 (s, 2 C, C<sup>14</sup>), 127.7 (s, 2 C, C<sup>16</sup>), 128.4 (s, 4 C, C<sup>1</sup>/C<sup>2</sup>), 129.0 (s, 2 C, C<sup>9</sup>), 131.2 (s, 2 C, C<sup>13</sup>), 134.8 (s, 2 C, C<sup>11a</sup>), 137.2 (s, 2 C, C<sup>9a</sup>), 137.3 (s, 2 C, C<sup>12a</sup>), 137.8 (s, 2 C, C<sup>16a</sup>), 145.1 (s, 2 C, C<sup>4a</sup>), 145.5 (s, 2 C, C<sup>5a</sup>)

<sup>103</sup>Rh NMR (22.2 MHz, THF-d<sub>8</sub>): δ = 1053 (s)

ATR IR – neat in cm<sup>-1</sup>: 3266 (s, NH<sub>2</sub> stretch); 3225 (s, NH<sub>2</sub> stretch); 3010 (m, CH stretch); 2831 (m, CH stretch); 1597 (m); 1575 (m); 1476 (s); 1230 (vs); 1135 (vs); 981 (s); 732 (s)

## B) Determination of bond dissociation energies (BDE's) using electrode potentials and thermodynamic cycles<sup>S1-S3</sup>.

Bond dissociation energies (BDE's) can be obtained by combining the equilibrium acidity constants,  $pK_a$ , of weak acids  $[BH]^+$  with the oxidation potentials of their conjugate bases, B, both measured in the same solvent (dmso or acetonitrile are commonly used). This method is based on the thermodynamic cycle shown in Scheme S1 for a compound  $[BH]^+$ :

**Scheme S1.** Thermodynamic cycle used to estimate the B-H bond dissociation energy of  $[BH]^+$  in solution

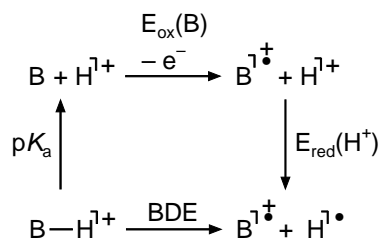

The bond dissociation Gibbs energy  $\Delta G_{BDE}^\circ$  [ $\text{kJ mol}^{-1}$ ] is given by:

$$\Delta G_{BDE}^\circ = 2.303 RT pK_a - FE_{red}^\circ(H^+) + FE_{ox}^\circ(B)$$

$\Delta G_{BDE}^\circ$  is related to gas phase bond dissociation energies BDE's which were quantitatively determined by various methods and are generally considered to be quite accurate:

$$\Delta G_{BDE}^\circ \approx BDE + \Delta G_{solv}(H^\bullet) - TS_{red}^\circ(H^\bullet)_g$$

This equation is based on the assumption that the difference in the solvation energies and entropies of  $[BH]^+$  and  $[BH]^{*+}$  is negligible. The magnitude of  $\Delta G_{solv}(H^\bullet)$  has been estimated in various solvents and  $S_{red}^\circ(H^\bullet)_g$  is equal to  $114.6 \text{ J K}^{-1} \text{ mol}^{-1}$ .  $E_{red}^\circ(H^+)$  has also been determined for various solvents.

Bordwell derived the following equation (1) which allows a quite accurate estimation of BDE's from measurements in solution and that allows comparisons to be made between compounds belonging to different compound families and with gas-phase values.

$$(1) \quad BDE = 5.73 pK_a + 96.5 E_{fc/fc^+}^\circ + C$$

Here the term  $5.7 pK_a$  is the equilibrium acidity constant of the weak acid expressed in  $\text{kJ mol}^{-1}$ . The term  $96.5 E_{fc/fc^+}^\circ$  is the oxidation potential of the conjugate base of the weak acid expressed in  $\text{kJ mol}^{-1}$  and referenced against the ferrocene/ferrocenium couple,  $Fc/Fc^+$ . The constant C is empirically derived for a given solvent by comparing the solution BDE's with accurate gas phase data and contains the above mentioned values for  $\Delta G_{solv}(H^\bullet)$ ,  $S_{red}^\circ(H^\bullet)_g$ , and  $E_{red}^\circ(H^+)$ . Values of  $C = 306.4 \text{ kJ mol}^{-1}$  and  $248.7 \text{ kJ mol}^{-1}$  are given for dmso or acetonitrile, respectively<sup>S3a</sup>. For a number of compound families (hydrocarbons, RH, amines,  $RNH_2$  and  $R_2NH$ , and alcohols, ROH) the BDE's were thus determined and solution and gas phase BDE's coincide mostly within  $\pm 4 \text{ kJ mol}^{-1}$ .

### References:

- S1 For a review on the estimation of bond energies in solution using electrode potentials and thermochemical cycles see: D.M. Wayner, V.D. Parker, *Acc. Chem. Res.* 1993, **26**, 287 – 294.
- S2 For BDE's see: D. F.McMillen, D. M.Golden, *Ann. Rev. Phys. Chem.* 1982, **33**, 493-532 and references cited therein.
- S3 For N-H BDE's in amines see: a) W.-Z. Liu, F.G. Bordwell, *J. Org. Chem.*, 1996, **61**, 4778 and references therein; b) F. G. Bordwell, J.-P. Cheng, G.-Z. Ji, A. V. Satish, X. Zhang, *J. Am. Chem. Soc.* 1991, **113**, 9790. Bordwell gives the equation  $BDE = 1.37 pK_a + 23.1 E_{fc/fc^+}^\circ + C$  expressing the data in  $\text{kcal mol}^{-1}$  with  $C = 73.3 \text{ kcal mol}^{-1}$  or  $59.5 \text{ kcal mol}^{-1}$  for dmso or acetonitrile, respectively.
